# Supplementary material for: Aronia melanocarpa extract extends the lifespan and health-span of Caenorhabditis elegans via mitogen-activated protein kinase 1
Source: Royal Society of Chemistry journal article supplement (doi:10.1039/d4fo02479f), 2024-01-01
Supplement: d4fo02479f1.pdf [file d4fo02479f1.pdf]

Figure S1

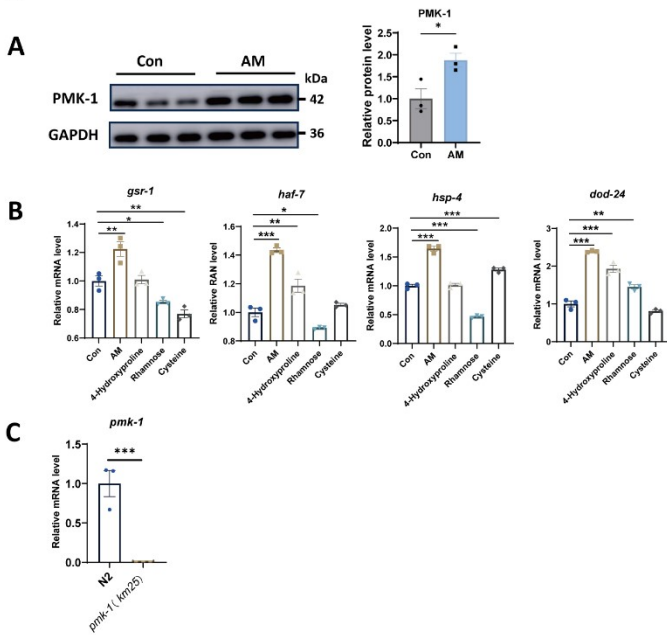

**Supplementary Figure 1.** AM upregulates PMK-1 expression and the mRNA level of PMK-1 downstream genes after AM and metabolites treatment. (A) The protein level of PMK-1 after

AM treatment. (B) The mRNA levels of PMK-1 downstream genes. (C) Verification of *pmk-1(km25)* mutant by RT-qPCR. Difference between groups were determined by unpaired two-tailed Student's *t* test or one-way ANOVA test followed by Tukey's multiple comparison. \*  $p < 0.05$ , \*\*  $p < 0.01$ , \*\*\*  $p < 0.001$
